# Supplementary material for: Genetic Diversity of Avian Influenza Viruses Detected in Waterbirds in Northeast Italy Using Two Different Sampling Strategies
Source: MDPI journal article supplement (doi:10.3390/ani14071018), 2024-03-27
Supplement: s1 [file s1]

## Supplementary Materials

**Table S1.** GISAID Epi-Flu Database accession numbers of the PB2, PB1, PA, HA, NP, NA, M, NS coding sequences for the AIV isolates collected during autumn-winter 2021 in the Emilia Romagna region, Northern Italy.

| Strain                                | Subtype    | Location                  | Accession Number                                                                               |
|---------------------------------------|------------|---------------------------|------------------------------------------------------------------------------------------------|
| A/teal/Italy/1821-10_22VIR4622-1/2021 | H1N1       | Buda, Bologna province    | EPI3073287, EPI3073288, EPI3073289, EPI3073290, EPI3073291, EPI3073292, EPI3073293, EPI3073294 |
| A/mallard/Italy/22VIR4203-2/2021      | H5N3 LPAIV | Argenta, Ferrara province | EPI3075426, EPI3075427, EPI3075428, EPI3075429, EPI3075430, EPI3075431, EPI3075438, EPI3075467 |
| A/teal/Italy/1856-7_22VIR4622-7/2021  | H9N2       | Buda, Bologna province    | EPI3073297, EPI3073298, EPI3073299, EPI3073300, EPI3073301, EPI3073302, EPI3073303, EPI3073304 |
| A/teal/Italy/1828-6_22VIR4622-5/2021  | H9N2       | Buda, Bologna province    | EPI3075410, EPI3075411, EPI3075412, EPI3075413, EPI3075414, EPI3075415, EPI3075416, EPI3075417 |
| A/teal/Italy/1821-14_22VIR4622-3/2021 | H9N2       | Buda, Bologna province    | EPI3075418, EPI3075419, EPI3075420, EPI3075421, EPI3075422, EPI3075423, EPI3075424, EPI3075425 |

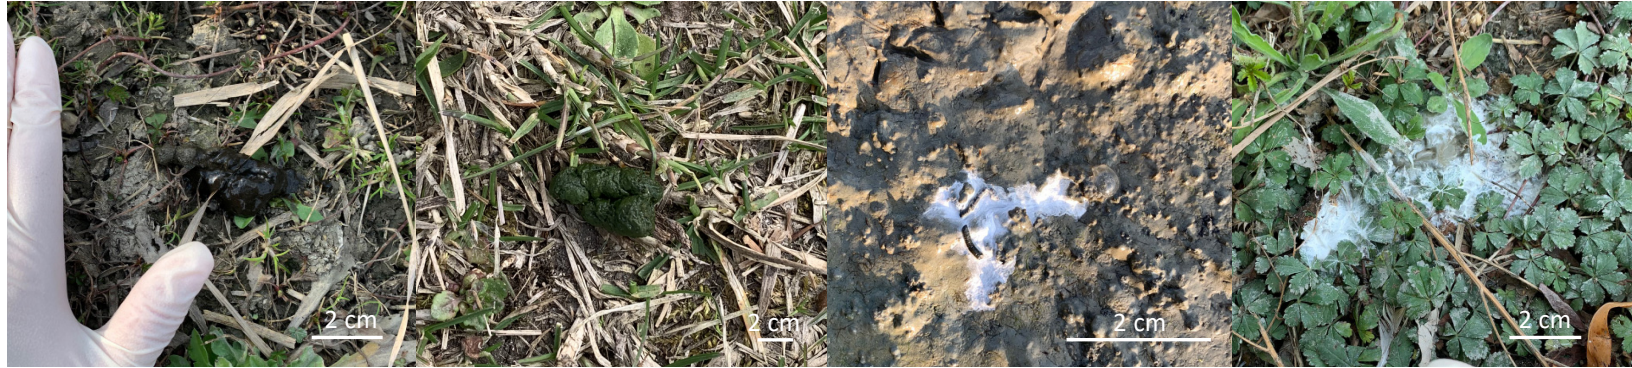

**Figure S1.** Avian faecal droppings from ducks (A), geese (B), shorebirds (C), herons (D). Specimens were identified through direct observations of Northern shoveler, greylag goose, common snipe, and grey heron, respectively, during sampling activities.

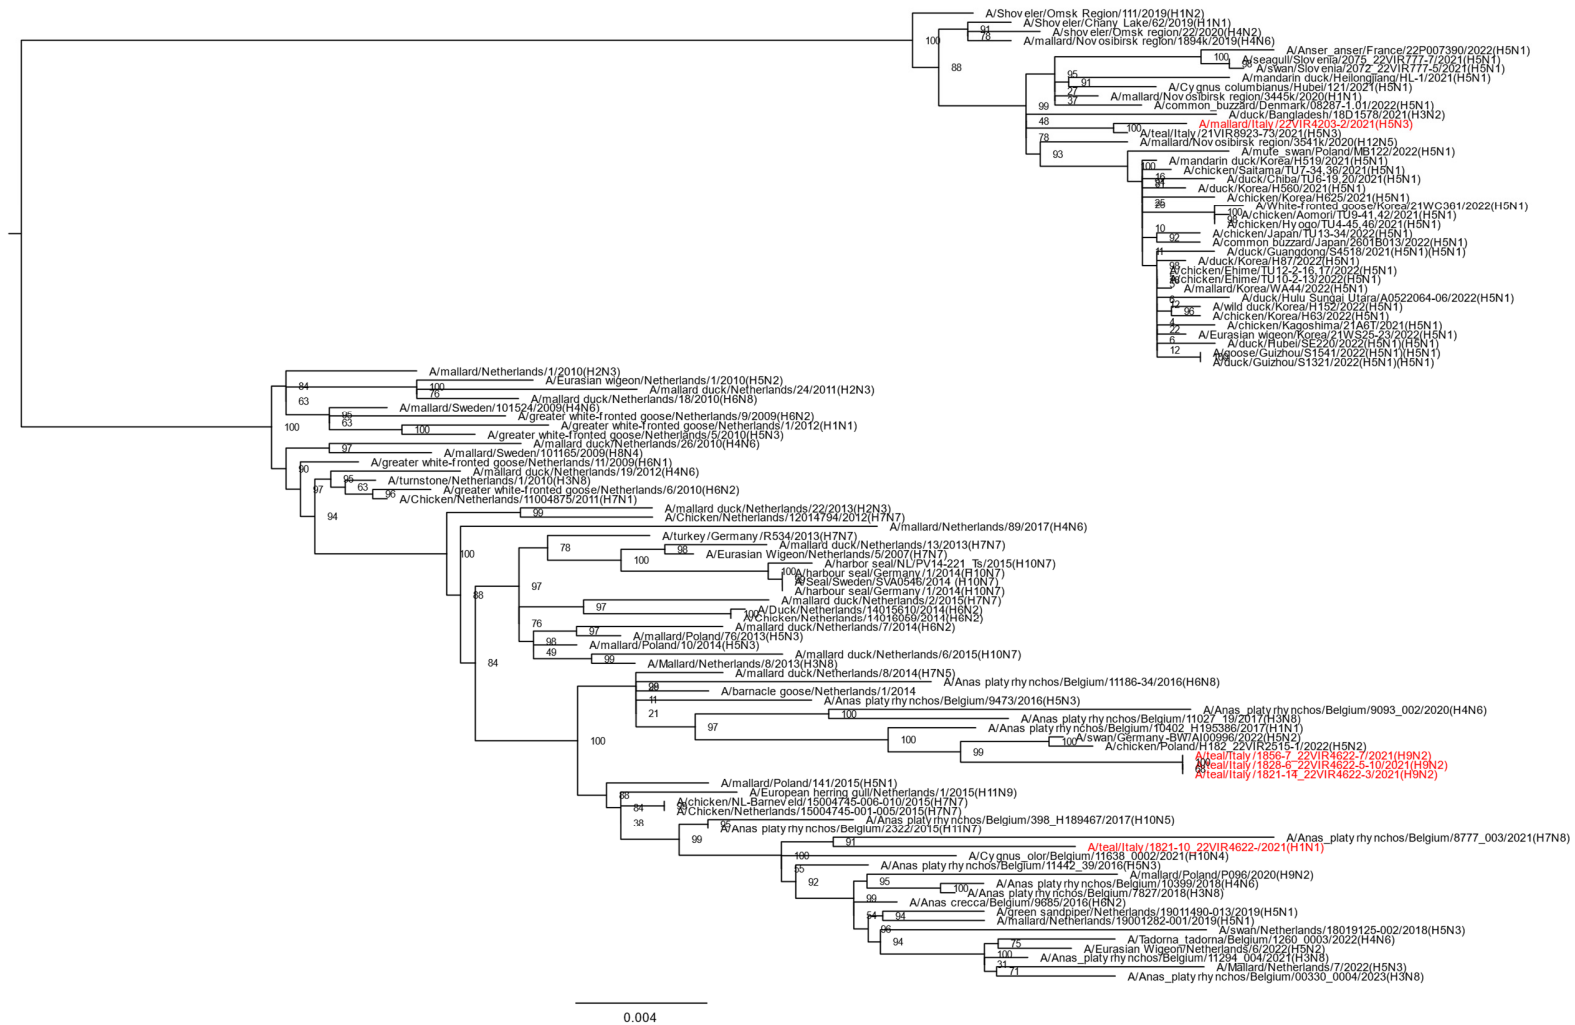

**Figure S2.** PB2 sequences phylogenetic maximum-likelihood reconstruction. The PB2 gene sequences of the isolates hereby obtained, namely A/teal/Italy/1821-10\_22VIR4622-1/2021(H1N1), A/mallard/Italy/22VIR4203-2/2021 (H5N3) LPAI, A/teal/Italy/1856-7\_22VIR4622-7/2021 (H9N2), A/teal/Italy/1828-6\_22VIR4622-5/2021 (H9N2), A/teal/Italy/1821-14\_22VIR4622-3/2021 (H9N2) are shown in red. The substitution model for the maximum likelihood phylogenetic reconstruction was TIM+F+G4.

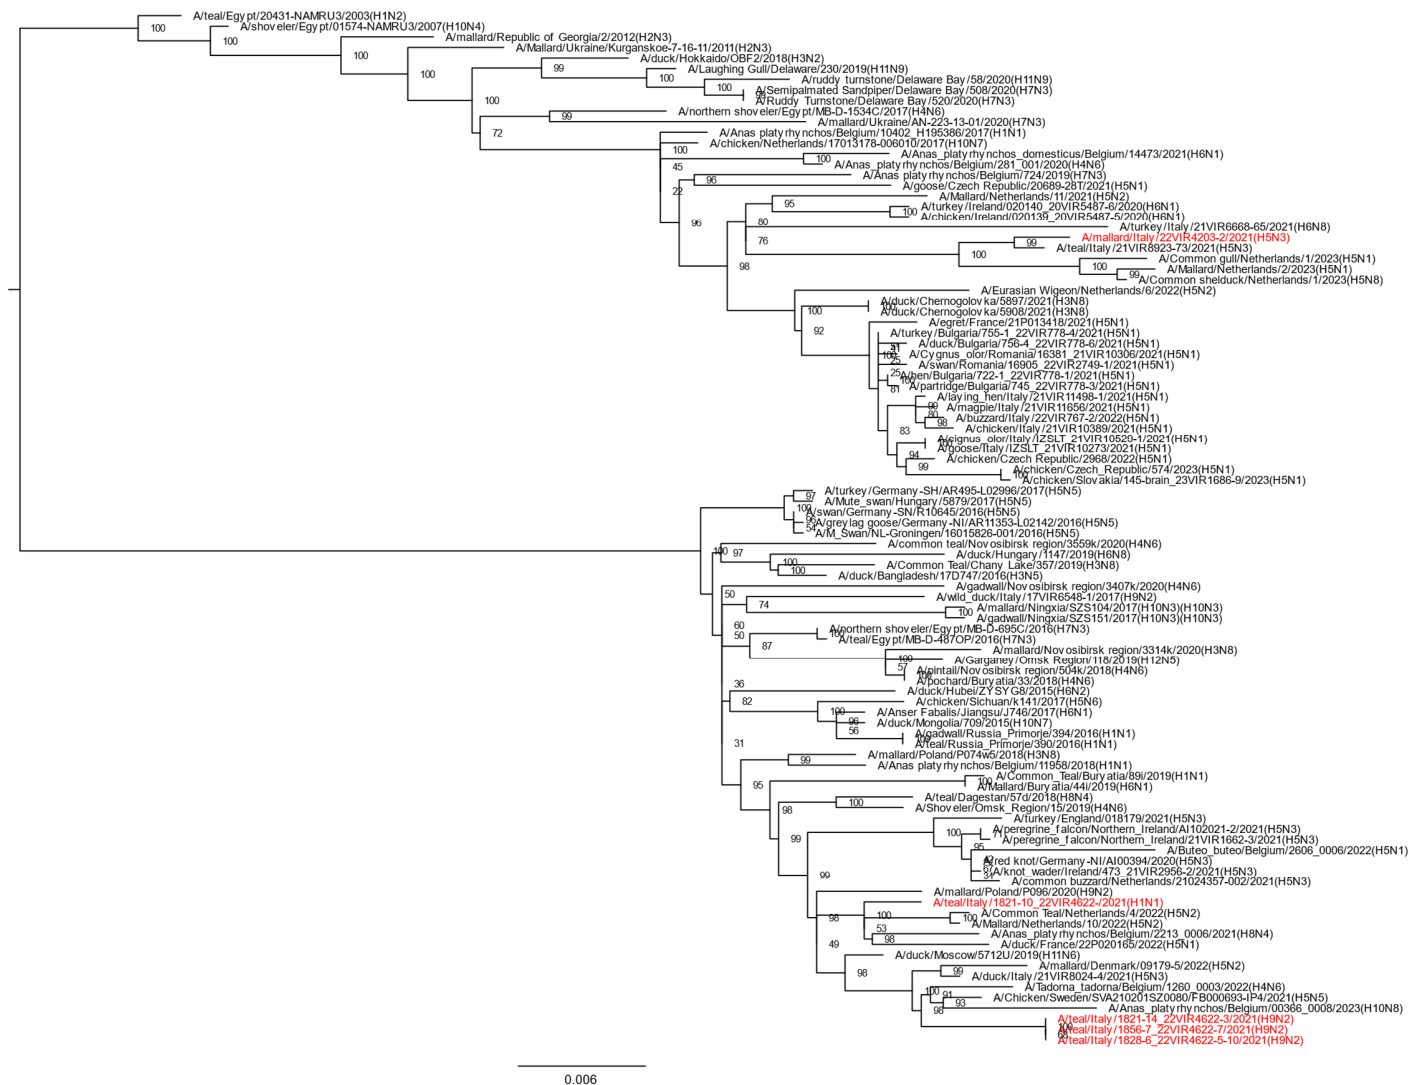

**Figure S3.** PB1 sequences phylogenetic maximum-likelihood reconstruction. The PB1 gene sequences of the isolates hereby obtained, namely A/teal/Italy/1821-10\_22VIR4622-1/2021 (H1N1), A/mallard/Italy/22VIR4203-2/2021 (H5N3) LPAI, A/teal/Italy/1856-7\_22VIR4622-7/2021 (H9N2),

A/teal/Italy/1828-6\_22VIR4622-5/2021 (H9N2), A/teal/Italy/1821-14\_22VIR4622-3/2021 (H9N2) are shown in red. The substitution model for the maximum likelihood phylogenetic reconstruction was TIM+G4.

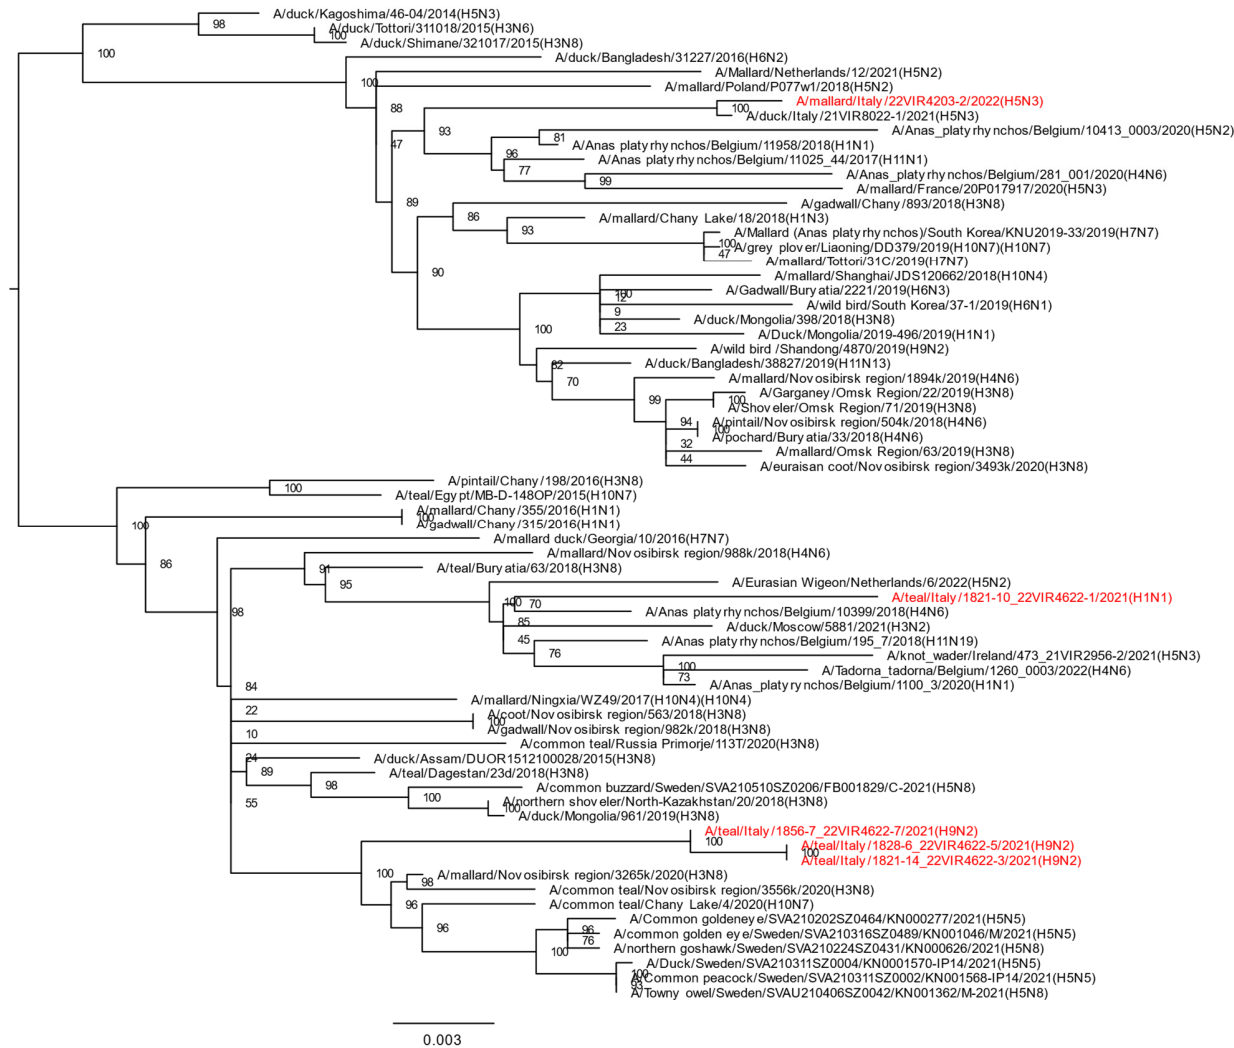

**Figure S4.** PA sequences phylogenetic maximum-likelihood reconstruction. The PA gene sequences of the isolates hereby obtained, namely A/teal/Italy/1821-10\_22VIR4622-1/2021 (H1N1), A/mallard/Italy/22VIR4203-2/2021 (H5N3) LPAI, A/teal/Italy/1856-7\_22VIR4622-7/2021 (H9N2),

A/teal/Italy/1828-6\_22VIR4622-5/2021 (H9N2), A/teal/Italy/1821-14\_22VIR4622-3/2021 (H9N2) are shown in red. The substitution model for the maximum likelihood phylogenetic reconstruction was K3Pu+F+G4.



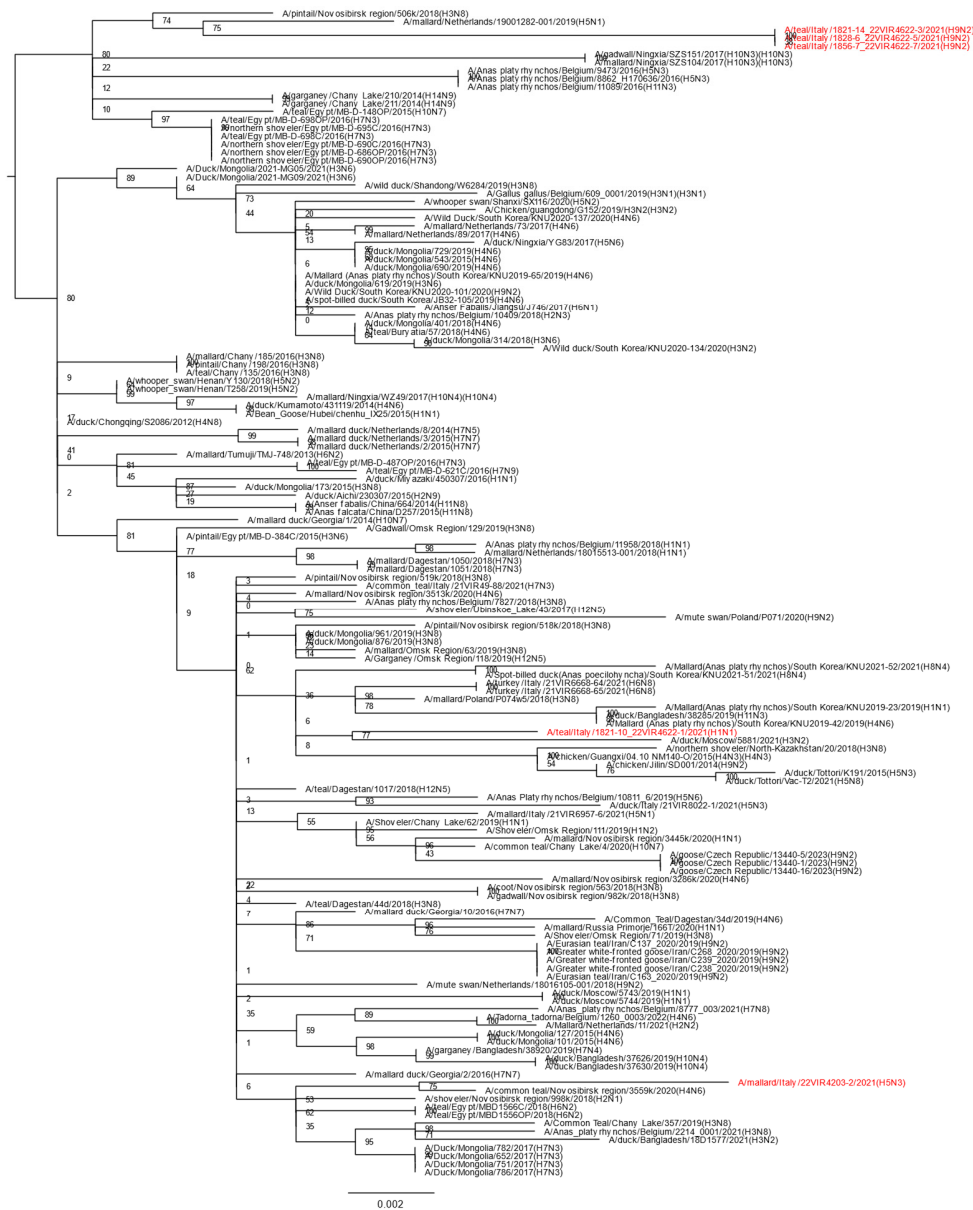

**Figure S5.** M sequences phylogenetic maximum-likelihood reconstruction. The M gene sequences of the isolates hereby obtained, namely A/teal/Italy/1821-10\_22VIR4622-1/2021(H1N1), A/mallard/Italy/22VIR4203-2/2021 (H5N3) LPAI, A/teal/Italy/1856-7\_22VIR4622-7/2021 (H9N2), A/teal/Italy/1828-6\_22VIR4622-5/2021 (H9N2), A/teal/Italy/1821-14\_22VIR4622-3/2021 (H9N2) are shown in red. The substitution model for the maximum likelihood phylogenetic reconstruction was K3P+I+G4.

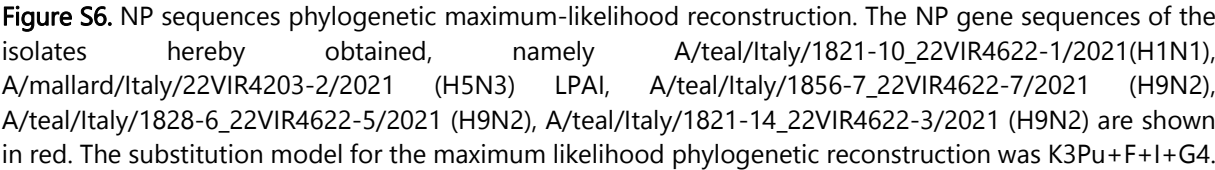

**Figure S6.** NP sequences phylogenetic maximum-likelihood reconstruction. The NP gene sequences of the isolates hereby obtained, namely A/teal/Italy/1821-10\_22VIR4622-1/2021 (H1N1), A/mallard/Italy/22VIR4203-2/2021 (H5N3) LPAI, A/teal/Italy/1856-7\_22VIR4622-7/2021 (H9N2), A/teal/Italy/1828-6\_22VIR4622-5/2021 (H9N2), A/teal/Italy/1821-14\_22VIR4622-3/2021 (H9N2) are shown in red. The substitution model for the maximum likelihood phylogenetic reconstruction was K3Pu+F+I+G4.



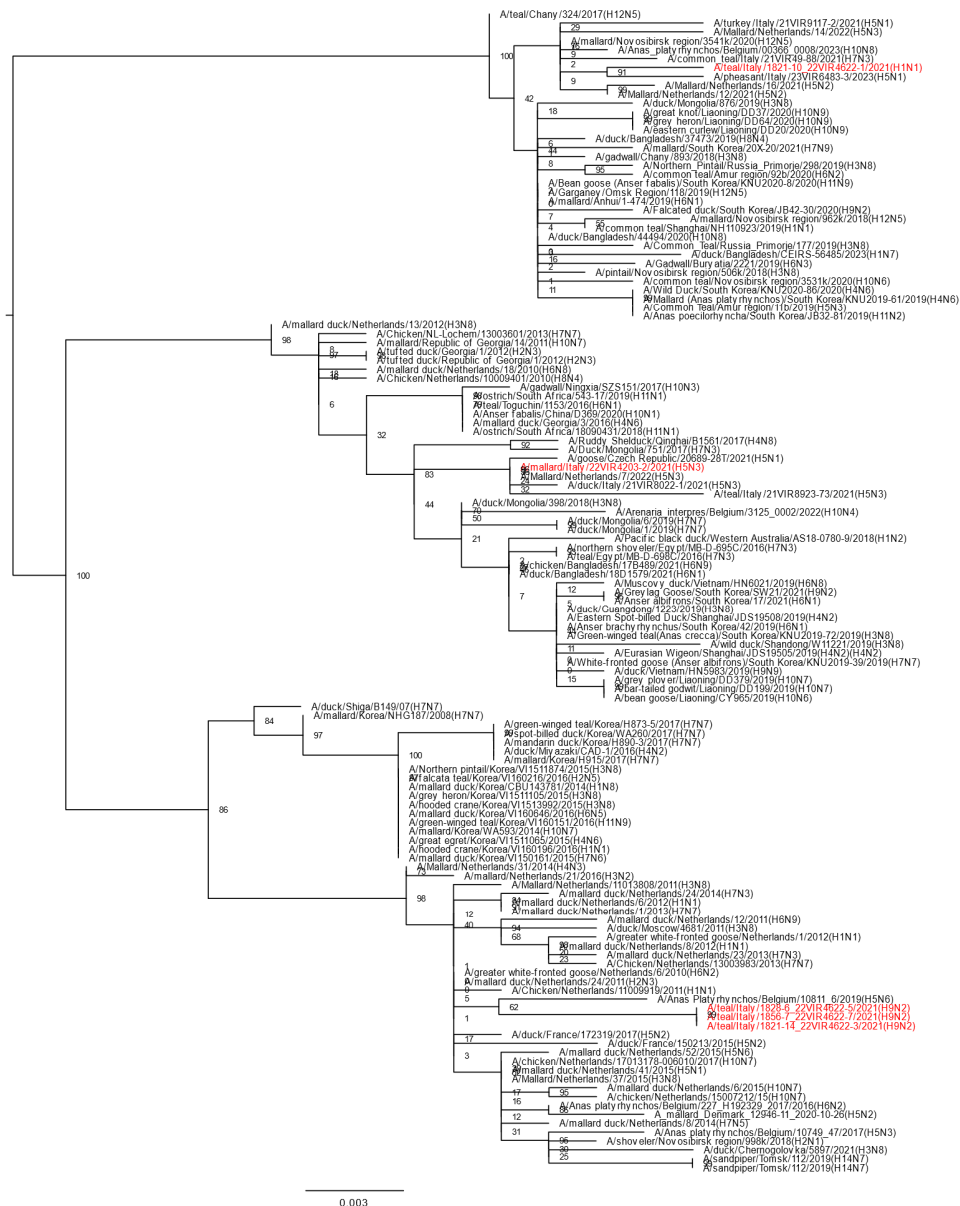

**Figure S7.** NS sequences phylogenetic maximum-likelihood reconstruction. The NS gene sequences of the isolates hereby obtained, namely A/teal/Italy/1821-10\_22VIR4622-1/2021(H1N1), A/mallard/Italy/22VIR4203-2/2021 (H5N3) LPAI, A/teal/Italy/1856-7\_22VIR4622-7/2021 (H9N2), A/teal/Italy/1828-6\_22VIR4622-5/2021 (H9N2), A/teal/Italy/1821-14\_22VIR4622-3/2021 (H9N2) are shown in red. The substitution model for the maximum likelihood phylogenetic reconstruction was TPM2u+F+I.
